# Supplementary material for: Balancing Growth and Defense: miRNA-Mediated Regulation of Phosphorus Metabolism and Pathogen Resistance in Soybean Under Variable Light Conditions
Source: Research Square preprint supplement (doi:10.21203/rs.3.rs-6577414/v1), 2025-06-12
Supplement: Supplementary file 1 [file 6add813d8074f4127a3f4e5a.docx]

*Supplementary_Material*

Balancing Growth and Defense: miRNA-Mediated Regulation of Phosphorus Metabolism and Pathogen Resistance in Soybean Under Variable Light Conditions

Jing Shang1†*, Xinmiao Yang1†, Siyu Li1, Jidan Hu1, Lingfang Du1, Kai Li2 and Wenyu Yang1

1 Sichuan Engineering Research Center for Crop Strip Intercropping System and College of Agronomy, Sichuan Agricultural University, Chengdu 611130, China

2 National Center for Soybean Improvement, National Key Laboratory for Crop Genetics and Germplasm Enhancement, Key Laboratory of Biology and Genetic Improvement of Soybean, Ministry of Agriculture, Nanjing Agricultural University, Weigang 1, Nanjing 210095, China

*** Correspondence:** Jing Shang; shangjing_edu@163.com

† These authors contributed equally to this work.

Keywords: *Soybean mosaic virus*, miRNA, phosphorus absorption, defense

**Table S1 Light conditions of different experimental groups**

| Treatment | Light indensity  (μmol·m-2·s -1) | Light quanlity  (μmol·m-2·s -1) |
| --- | --- | --- |
| NC | 565.14 | 4.27 |
| NS | 565.14 | 4.27 |
| LC | 50.85 | 0.48 |
| LS | 50.85 | 0.48 |

**Table S2 Primers for RT-qPCR**

| Gene ID | Forward primer | Reverse primer |
| --- | --- | --- |
| SMV-670 | AAAGAGAGGGTAACACACAA | GATCGCTCATCAAACAATAA |
| Actin | CCATGTTCCCTGGTATTGCTG | GTATTTTCTCTCCGGTGGTGC |
| SMV-CP | GCTTGGACCACTTGCT | ACACCCATCTGCTCATC |
| GmNPR1-1 | CTGGTCTTTCTGCGTCAA | CGTAAGGGCTTCCATTCT |
| GmPR1-6 | TGGTGACCTAAGTGGCACAG | GCAGACACTCTCCACCAACA |
| GmMYC2 | GCTTTAGGCTCGGTTCTC | GTGCTGTACGAGGTTCCA |
| GmPDF1.2 | GCAAACTGAGGCAAAGAC | GCACCAACAGCGAAAATC |
| GmERF1A | AAATCAAGCACCACTCAA | CACCTCAGCCTGCAACTC |
| GmERF1B | ATGGAAAGCGACAGGAAT | TAGCGTCAACCGAAGAGG |
| GLYMA_01G010700 | GCTGCGTATGCTCAAGAC | CACCACCAGAGTGGACAA |
| GLYMA_01G091800 | GAGGGGCAACTCATTCCAGA | AGCTTGGTGCTTGTTTTGTGTA |
| GLYMA_02G005800 | GACAAGATAGGATGTGAATGC | CCATCCCAAGAATGTATTGC |
| GLYMA_03G189200 | AGGGTCCATGTTTAGAGCCG | TCTTTTGCTTTCTGAGCCGC |
| GLYMA_07G002900 | GACCACTCTAGCATCACCTG | TTCTGGTGGAATAGGTGGAAG |
| GLYMA_08G021900 | TTGATGGGATCTACAACAGGTC | ATCAATTTCCACCGGATCAAG |
| GLYMA_09G022600 | GTTTGATCCTTCGGTTGGTG | ATTTGGCCCCATAAACCTCT |
| GLYMA_10G036800 | TGTCACTACGTCTACTCTTGATGT | CGTCTTGCTGAGTCATGTATGC |
| GLYMA_20G163400 | CTTCGTTCTTCATTTGCGTA | TGATTAAGGTACGCTCGATAG |
| GLYMA_20G204100 | CTCCCAGCTCTGCTCACATA | CCAACAGGAACCAAGTAGTGGC |
| U6 | GACCATTTCTCGATTTGTGCGTGTC | Universal reverse Q primer  Universal reverse Q primer |
| gma-miR1512b | GGCCGCCGTAACTGGAAATTCTTAAAGCAT |
| gma-miR159d | GGCAGCTGCTTAGCTATGGATCCCA |
| gma-miR167a | TGAAGCTGCCAGCATGATCTAA |
| gma-miR167e | CCTGAAGCTGCCAGCATGATCTTA |
| gma-miR3522 | GAGACCAAATGAGCAGCTGA |
| gma-miR397a | TGAAGCTGCCAGCATGATCTAA |
| gma-miR398c | GTGTGTTCTCAGGTCGCCCCTGAA |
| gma-miR408d | GCTGCACTGCCTCTTCCCTGGAA |
| gma-miR4365 | AAGAACTTCTTCCGCGAGATCGCA |
| gma-miR5380c | ATGAATGGTGAAGATGAAGAG |
| pCAMBIA1300-35S-EGFP | CGTGGAAAAAGAAGACGTTCCAACCAC | CGTCGCCGTCCAGCTCGACCAG |
| pGreenII 0800-miRNA | TAACAACCGCGAAAAAGTTGCG | AGATCTCAAACAAACACATACAGCG |
| Pre-miR397a | acgggggacgagctcggtaccCGATAGATAATAGTAACGACTAGTCAATTAGTG | cgcgtacgagatctggtcgacTGGTTCCTGAAATAAAACTGCTCA |
| Pre-miR399j | acgggggacgagctcggtaccATGCTTATCAGTGGCATATCCAAG | cgcgtacgagatctggtcgacCCAATTGTCTCAGAAAATCTCTGATT |
| Pre-miR408d | acgggggacgagctcggtaccTATATATAGAGAGGGATTATATCAAATCTATGC | cgcgtacgagatctggtcgacGCCGGGCAACTGTGGATG |
| GmPHT1-4 | ttctagagcggccgcggatccGCCGTGCCTTAATTCGGC | actggtgatttcagcgaattcCACAGTAACACCATAATAAACCGAGC |
| GmLAC7 | ttctagagcggccgcggatccTTGTGAGTTATCGAGTTAAACCTTCAA | actggtgatttcagcgaattcTGTTGATTGAAACGCCTGGG |
| GmLAC12 | ttctagagcggccgcggatccCGAAACACCCATTCTTCTTGGG | actggtgatttcagcgaattcATGAGGTGACTTGTATTCGAGTATGG |
| GmNUD2 | ttctagagcggccgcggatccATGATGAGTTCTAGAGCTTGTAAGCC | actggtgatttcagcgaattcTGGTGGAATCTGAATCCAGCC |
| GmPHT1-4-MUT | TtctcattaataagaaGACCACGAAGTTTAATTCATTCTTCT | CttcttattaatgagaAATGATCTAATTCAGCAGGAAGATTATAG |
| GmLAC7-MUT | CTGCAgagttacCACAACACTTTTTTAAGATAGCCAACC | TTGTGgtaactcTGCAGCGTTGATAATGCGCA |
| GmLAC12-MUT | CTGCAgagttagtACCTCTCTTCTTCACCGTCGC | GAGGTactaactcTGCAGCATTGATAACACGTAGAAG |
| GmNUD2-MUT | AAGAGcttcacgCAAGTAAAGCCATTGATACACTCAGA | ACTTGcgtgaagCTCTTCCTTGGCCAGAGAAGC |
| RT-U6 | GTGCAGGGTCCGAGGTTTTGGACCATTTCTCGAT | |
| RT-miR399j | GTCGTATCCAGTGCAGGGTCCGAGGTATTCGCACTGGATACGACCAGGGC | |
| RT-miR397a | GTCGTATCCAGTGCAGGGTCCGAGGTATTCGCACTGGATACGACCATCAA | |
| RT-miR408d | GTCGTATCCAGTGCAGGGTCCGAGGTATTCGCACTGGATACGACGCCAGG | |
| q-U6 | GGAACGATACAGAGAAGATTAGCA | GTGCAGGGTCCGAGGT |
| q-miR397a | GGCTTACGTCATTGAGTGCAGC | GTGCAGGGTCCGAGGT |
| q-miR399j | CGCGTGCCAAAGGAGATTT | GTGCAGGGTCCGAGGT |
| q-miR408d | CCACCATGTGCACTGCCTCTT | GTGCAGGGTCCGAGGT |
| linker-STTM | GTTGTTGTTGTTATGGTCTAATTTAAATATGGTCTAAAGAAGAAGGAAT | |
| STTM-miR399j | GGAGAGGACAGGGTACCCcagggcaaatcctatcctttggcaGTTGTTGTTGTTATGG | CTCTAGAGGATCCCCtgccaaaggactagatttgccctgATT CTTCTTCTTTAGACCA |
| STTM-miR397a | GGAGAGGACAGGGTACCCCATCAACGCTGCTACACTCAATGAGTTGTTGTTGTTATGG | CTCTAGAGGATCCCCTCATTGAGTGCTACAGCGTTGATGATTCTTCTTCTTTAGACCA |
| 5’RACE adaptor | GCUGAUGGCGAUGAAUGAACACUGCGUUUGCUGGCUUUGAUGAAA | |
| RACE Outer Primer | GCTGATGGCGATGAATGAACACTG | |
| 5’RACE Inner Primer | CGCGGATCCGAACACTGCGTTTGCTGGCTTTGATG | |
| GmLAC7 gene-specific outer primer | TGGCATTCTCATAAATGACCAC | |
| GmLAC7 gene-specific inner primer | TGGAGTGAAGGCCATGTAAT | |
| GmLAC12 gene-specific outer primer | ATGGTGAGAATGATTACT | |
| GmLAC12 gene-specific inner primer | AGGTGACTTGTATTCGAGTA | |
| GmPHT1-4 gene-specific outer primer | ATGGTGGCCGAAAGAGGG | |
| GmPHT1-4 gene-specific inner primer | TCTCCACCAATGCCAAAACCA | |
| GmNUDT2 gene-specific outer primer | TCCAATTCACAAGCATCAAGTAAT | |
| GmNUDT2 gene-specific inner primer | ATGGTGGAATCTGAATCCAGCCTTAA | |
